# Supplementary material for: Temporal Stability and Determinants of White Blood Cell DNA Methylation in the Breakthrough Generations Study
Source: Oxford University Press journal article supplement (doi:10.1158/1055-9965.epi-14-0767), 2014-11-04
Supplement: 10559965epi140767-sup-134283_1_supp_2657035_nbs74c.xlsx [file 10559965epi140767-sup-134283_1_supp_2657035_nbs74c.xlsx]

## Sheet: Sheet1
Supplementary Table 1
			This study				Florath et al.
IlmnID	Chr	UCSC generef	b	P-value	ICC		b	P-value
cg16867657	6	ELOVL2	0.0190336	2.62e-32	0.739791		0.048095	2.054e-58
cg24724428	6	ELOVL2	0.0202535	4.18e-26	0.636039		0.047849	5.345e-35
cg06639320	2	FHL2	0.0181798	8.99e-24	0.65769		0.030167	3.471e-25
cg21572722	6	ELOVL2	0.0111692	3.14e-23	0.658257		0.022746	2.802e-33
cg07553761	3	TRIM59	0.014967	6.38e-20	0.74356		0.028278	9.501e-18
cg22454769	2	FHL2	0.0210885	1.78e-19	0.712249		0.043984	5.378e-24
cg17110586	19		0.0124061	2.61e-18	0.634319		0.026352	1.343e-26
cg09809672	1	EDARADD	-0.0156103	1.78e-17	0.788022		-0.027717	7e-14
cg24079702	2	FHL2	0.017358	1.86e-16	0.684189		0.034411	8.346e-23
cg23500537	5		0.0135895	2.2e-16	0.729485		0.027301	4.048e-21
cg25778262	12	CPM	0.0091802	1.84e-15	0.688868		0.019019	1.184e-14
cg08160331	11	KLHL35	0.0102199	2.19e-15	0.658344		0.021067	4.902e-18
cg07082267	16		-0.0086971	3.17e-15	0.572626		-0.016468	1.649e-13
cg07547549	20	SLC12A5	0.0187819	9.5e-15	0.605608		0.032192	2.906e-22
cg10804656	10		0.0120313	2e-14	0.626915		0.028143	1.298e-16
cg04875128	15	OTUD7A	0.0289558	2.13e-14	0.413716		0.045425	1.113e-24
cg15480367	14	CHGA	0.0097192	4.9e-14	0.498678		0.020565	4.655e-20
cg01820374	12	LAG3	-0.014512	5.57e-14	0.620385		-0.022865	1.621e-21
cg22273555	6		-0.0085684	1.01e-13	0.508401		-0.013577	1.032e-10
cg25410668	1	RPA2	0.0135175	1.61e-13	0.661934		0.022775	5.381e-11
cg00292135	7	C7orf13;RNF32	0.0191329	1.71e-13	0.593053		0.021651	2.473e-10
cg11071401	17	CACNA1G	0.0103162	2.38e-13	0.605347		0.023811	3.646e-18
cg22156456	17	EIF1	-0.014811	2.51e-13	0.604452		-0.015896	8.81e-19
cg14361627	7	KLF14	0.0177848	2.5e-12	0.631725		0.022336	3.283e-12
cg14674720	2		0.0119933	2.8e-12	0.521929		0.020675	1.671e-12
cg04940570	11	TEAD1	0.0172202	4.56e-12	0.461223		0.026939	5.259e-16
cg08097417	7	KLF14	0.0150779	8.97e-12	0.641254		0.017566	1.374e-17
cg22747507	4	GLRA3	-0.0101909	1.02e-11	0.462476		-0.020263	6.016e-16
cg06493994	6	SCGN	0.010908	1.19e-11	0.492041		0.01693	2.514e-14
cg19283806	18	CCDC102B	-0.0190384	1.24e-11	0.416446		-0.039403	2.242e-24
cg01281911	1	FOXE3	0.0180419	2.42e-11	0.398153		0.01888	8.377e-11
cg20052760	6		-0.0132754	2.64e-11	0.559704		-0.011051	6.449e-05
cg07955995	7	KLF14	0.0212517	2.78e-11	0.474809		0.014926	2.432e-13
cg06335143	1	ZYG11A	0.0126759	4.82e-11	0.668736		0.018098	8.704e-14
cg07080372	11	SLC25A22	-0.0177916	5.14e-11	0.402011		-0.01892	2.776e-17
cg16015712	1	ZYG11A	0.0170003	5.3e-11	0.386666		0.014645	4.427e-09
cg23091758	11	NRIP3	0.0208165	5.68e-11	0.370636		0.012771	2.136e-07
cg01763090	15	OTUD7A	0.0139345	6.58e-11	0.360194		0.013531	2.085e-14
cg05991454	4		0.0142451	7.62e-11	0.476308		0.027967	4.547e-17
cg23744638	11		-0.0167111	1.24e-10	0.729498		-0.032249	2.647e-10
cg23606718	2	FAM123C	0.013472	1.44e-10	0.432183		0.024058	1.013e-15
cg18473521	12	HOXC4	0.0160149	1.68e-10	0.599381		0.031768	2.988e-19
cg03259243	17		0.0089261	1.8e-10	0.492797		0.02064	5.675e-14
cg03236802	6	TNXB	0.0109845	1.9e-10	0.709788		0.021214	5.91e-12
cg12765028	4		0.0078541	1.94e-10	0.680685		0.020623	1.521e-13
cg04427498	7		0.0126986	2.37e-10	0.581438		0.021748	1.978e-15
cg06784991	1	ZYG11A	0.0084299	3.04e-10	0.470756		0.026332	9.972e-21
cg15618978	3	TRIM59	0.0105003	3.26e-10	0.596888		0.029734	2.19e-14
cg08234504	5		-0.008737	3.94e-10	0.455411		-0.016877	1.209e-24
cg11751101	12	C1R	-0.0126036	4.12e-10	0.566485		-0.018751	1.142e-11
cg20822990	1	ATP13A2	-0.0075322	4.21e-10	0.226365		-0.014047	3.441e-12
cg22285878	7	KLF14	0.0164737	5.59e-10	0.457621		0.008703	3.006e-11
cg20809087	15	BRUNOL6	0.0126588	1.22e-09	0.373325		0.013425	2.185e-11
cg03032497	14		0.0109166	1.74e-09	0.431392		0.025658	8.742e-09
cg00481951	3	SST	0.0130358	1.9e-09	0.643489		0.02166	8.321e-18
cg25427880	10		0.0119761	2.11e-09	0.76207		0.016584	1.729e-13
cg11220950	16	SYNGR3	0.0075585	2.55e-09	0.666042		0.016841	1.716e-19
cg16477091	17	PPM1E	0.0136036	2.57e-09	0.287932		0.011706	2.296e-07
cg16541931	10	LOC100128811;GPR158	0.0147743	2.82e-09	0.438747		0.017014	4.444e-11
cg01974375	1	PI4KB	-0.011197	3.67e-09	0.501777		-0.016748	6.485e-19
cg09401099	3		0.015735	5.43e-09	0.280459		0.019762	2.161e-12
cg05619598	19		-0.0101212	6.41e-09	0.369806		-0.013875	3.312e-10
cg00741624	14	KIAA1409	0.0104607	6.68e-09	0.45114		0.019597	1.344e-12
cg04208403	16	ZNF423	-0.0059316	8.32e-09	0.532754		-0.013577	2.179e-12
cg22016779	2	DNER	-0.0147598	9.4e-09	0.56602		-0.019078	5.681e-14
cg05308819	1		-0.0065027	9.4e-09	0.474641		-0.013741	4.518e-10
cg01844642	3	GPR62	0.0080931	9.79e-09	0.424599		0.023465	8.234e-22
cg16419235	8	PENK	0.0102122	1.08e-08	0.463127		0.023383	1.296e-16
cg10281977	14	TMEM179	0.0108189	1.16e-08	0.324462		0.013688	3.772e-05
cg18651026	6	COL11A2	-0.0063985	1.29e-08	0.557967		-0.01727	4.584e-12
cg13381486	2	FAM123C	0.0093807	2.38e-08	0.282302		0.009199	2.016e-07
cg00439658	17	GRIN2C	0.0118984	3.17e-08	0.451725		0.017956	9.939e-13
cg01528542	12		-0.012188	4.23e-08	0.448977		-0.03156	1.66e-18
cg20273670	17		0.0092073	5.59e-08	0.598104		0.032196	2.02e-18
cg11176990	2	LOC375196;LOC100271715	0.0198564	6.26e-08	0.352131		0.008982	2.548e-13
cg26161329	17	PPM1E	0.0105513	6.4e-08	0.431939		0.014363	2.527e-08
cg04604946	12	LRRC23;ENO2	-0.0081346	6.7e-08	0.491905		-0.015974	7.684e-11
cg05369942	4		-0.0145871	7.62e-08	0.459683		-0.012875	1.538e-09
cg06782035	5		0.0312915	1.07e-07	0.495158		0.034653	3.168e-05
cg07502389	8	NEFM	0.0132237	1.21e-07	0.377338		0.019666	1.181e-21
cg07806886	3	STXBP5L	0.0108744	1.27e-07	0.551964		0.016015	2.358e-10
cg18898125	8	NEFM	0.0145832	1.44e-07	0.152819		0.015236	8.151e-16
cg19593767	20	TOX2	0.0081453	1.59e-07	0.376542		0.011985	4.299e-05
cg18064714	7	SP8	0.0077527	1.69e-07	0.211621		0.060344	1.625e-17
cg04894619	3	PEX5L	0.0097679	2.13e-07	0.267216		0.013831	5.538e-10
cg17885226	6		0.0121555	2.41e-07	0.185088		0.025665	2.504e-19
cg08090640	17	IFI35	-0.0087456	3.58e-07	0.408055		-0.027631	4.206e-23
cg12943155	3	PODXL2	0.04178	3.88e-07	0.302299		0.009342	5.682e-12
cg14692377	17	SLC6A4	0.0096819	4.24e-07	0.222563		0.01898	2.962e-13
cg10137837	17	BCL6B	0.0069071	4.24e-07	0.683883		0.022064	3.389e-12
cg14973055	17	DNAI2	-0.0094399	4.27e-07	0.480621		-0.016871	6.755e-11
cg03350900	6	SOBP	0.0128007	4.4e-07	0.31859		0.020867	3.253e-12
cg21296230	15	GREM1	0.0098609	5.76e-07	0.253637		0.022973	2.051e-13
cg05316627	6		-0.0110252	6.69e-07	0.626143		-0.024637	1.088e-10
cg02336827	3	LIMD1	-0.0083357	1.01e-06	0.452856		-0.014201	6.951e-15
cg08540945	7		0.0085065	1.01e-06	0.356932		0.01848	4.565e-11
cg21801378	15	BRUNOL6	0.0134718	1.1e-06	0.262642		0.014239	1.053e-11
cg08622677	12	PRMT8	0.0072318	1.27e-06	0.345969		0.014418	1.183e-15
cg21117668	2	BOK	0.0159895	1.33e-06	0.477894		0.014212	1.866e-09
cg08262002	4	LDB2	-0.0087086	1.43e-06	0.759991		-0.028999	2.755e-23
cg23078123	1	GPR177	-0.0082373	1.56e-06	0.713595		-0.018333	1.015e-09
cg13806741	11	FAM181B	0.0075658	1.89e-06	0.491719		0.012866	1.94e-08
cg00448560	16	ZNF423	-0.0087279	3.12e-06	0.492565		-0.015806	1.778e-12
cg18815943	1	FOXE3	0.0235699	3.79e-06	0.248244		0.010845	1.076e-10
cg21567504	15	OCA2	0.0070388	4.18e-06	0.196588		0.014219	3.473e-08
cg13473356	3	PEX5L	0.0105727	4.46e-06	0.30302		0.012142	1.546e-09
cg10751726	2	LOC150786	0.0144513	4.8e-06	0.587097		0.013869	1.894e-07
cg13649056	9		0.0088534	5.88e-06	0.367152		0.017773	1.458e-22
cg08426733	1	VWA1	-0.0052634	1.09e-05	0.586293		-0.015708	9.876e-18
cg19560758	1	ERRFI1	0.0070107	1.16e-05	0.407287		0.018868	4.444e-13
cg12189835	11	SYT7	0.0091725	1.29e-05	0.186211		0.014528	7.25e-11
cg00318320	2	BOK	0.0124059	1.33e-05	0.157183		0.015015	3.376e-09
cg13039251	5	PDZD2	-0.0131741	1.57e-05	0.751671		-0.026869	1.12e-08
cg23341182	10	BLOC1S2	-0.011153	1.75e-05	0.568663		-0.023818	2.353e-16
cg14977938	14	ZFYVE21	-0.0085455	2.07e-05	0.621784		-0.017727	7.066e-10
cg03607117	3	SFMBT1	0.0111509	3.92e-05	0.464607		0.01073	5.263e-11
cg18448426	22	APOL1	-0.0097901	4.37e-05	0.475031		-0.022175	7.258e-12
cg22682811	20		0.0131744	4.87e-05	0.315656		0.022406	2.735e-13
cg18343474	1		0.0075641	5.57e-05	0.115393		0.010438	3.374e-07
cg13388731	2	DNAJB2	-0.0067856	5.88e-05	0.346412		-0.01697	2.668e-13
cg06943835	11	ATG2A	-0.0046539	6.08e-05	0.259035		-0.015214	1.198e-12
cg14314729	5		-0.0065534	7.23e-05	0.60732		-0.019418	6.433e-16
cg12206199	2	LOC375196;LOC100271715	0.0158489	9.66e-05	0.26917		0.00891	4.459e-14
cg19711579	2	NEUROD1	0.0072523	9.89e-05	0.0561397		0.011219	1.078e-11
cg23995914	4	ZNF518B	0.0102142	0.0001109	0.502051		0.019383	3.058e-06
cg25316339	5	ANKRD34B	0.0105406	0.0001158	0.183397		0.018533	5.569e-10
cg24436906	2	BOK	0.0070463	0.0001183	0.477849		0.020205	4.017e-16
cg13806070	1	BMP8A	0.0083796	0.000234	0.264811		0.007804	4.472e-09
cg02151301	20	HM13	-0.0068828	0.0002428	0.38391		-0.016205	6.337e-12
cg16061228	11	SCN4B	-0.0048458	0.0002602	0.125481		-0.008759	3.752e-06
cg06291867	10	HTR7	0.0069627	0.0002822	0.445443		0.012629	2.443e-08
cg23973429	8	GRHL2	0.0059156	0.0003014	0.247687		0.017205	8.94e-09
cg16644497	19	ZNF599	0.0192832	0.0003369	0.13366		0.009985	1.599e-07
cg27569300	15	SYNM	0.0070933	0.0003706	0.139495		0.00973	3.044e-09
cg21709871	8	NRBP2	0.0081195	0.0003851	0.438764		0.02033	9.112e-07
cg20426994	7	KLF14	0.008527	0.000628	0.191453		0.012153	3.036e-08
cg19784428	19	NWD1	-0.0085936	0.000679	0.731576		-0.025963	5.303e-09
cg03399905	15	ANKRD34C	0.0075354	0.0007465	0.424126		0.012037	8.876e-11
cg21186299	7	VGF	0.0719778	0.0008474	0.0527732		0.005357	3.936e-09
cg16295725	4	ZNF518B	0.0249917	0.0010496	0.301319		0.010207	2.004e-08
cg15957394	4	AFAP1	0.0068472	0.0010913	0.38336		0.012489	9.039e-08
cg07920503	13	FAM123A	0.008824	0.0014842	0.236797		0.015991	1.023e-10
cg25078444	14	FOXG1	0.0293394	0.001712	0.336816		0.020905	2.862e-09
cg26158023	3	CCBP2	-0.0047016	0.0019488	0.395954		-0.009037	4.51e-08
cg19401340	17	PPM1E	0.0196225	0.002014	0.216748		0.007929	5.346e-09
cg21800232	5	ANKRD34B	0.0079144	0.0028245	0.211701		0.016937	2.049e-09
cg03915012	4	GAK	-0.0089045	0.0039908	0.530451		-0.014954	1.095e-09
cg02018902	15	ANKRD34C	0.00571	0.0069255	0.0860915		0.0133	8.338e-12
cg22197050	2	LOC100132215	0.003588	0.0665562	0.0913016		0.017828	8.083e-09
cg07394446	15	ADAMTS17	0.0054933	0.0736274	0.161222		0.011307	2.072e-06
cg24436715	19		0.0028944	0.156242	0.22505		0.00564	2.073e-06
